# Supplementary material
Source: publisher figshare collection journal article supplement (https://tandf.figshare.com/ndownloader/files/17468981)
Supplement: Supplementary file 1 [file 17468981]

## Sheet: XRF
Sample Name	KSC001	KSC002	GF006	GF007	MSE010	MSE013	MSE017	MSE018	MSE019	MSE019	MRd20	MRd21	MRd22	MSE027	ORE039B	MSE40	HF043	HF044	MSE045	MSE046	MSE047	MSE053	MSE054	MSE055	MSE056	MSE057	MSE057	SF059	SF060	MSE062	MSE063
Major elements (XRF, wt.%)
(Raw data; all Fe expressed as Fe2O3)
SiO2	48.9	49.04	59.54	60.08	61.42	60.38	58.66	61.65	62.33	62.33	61.38	60.88	57.57	44.96	62.15	57.68	57.82	56.89	57.69	56.34	56.03	56.85	58.18	63.31	61.19	63.72	63.72	52.67	57.54	59.95	56.35
Al2O3	14.39	14.27	16.23	16.46	16.97	17.58	16.17	17.17	16.75	16.75	17.24	17.5	17.31	22.82	17.71	17.2	16.78	17.29	17.8	18.07	18.33	17.51	17.38	17.46	17.29	16.16	16.16	15.59	17.87	17.84	19.04
TiO2	1.48	1.48	0.66	0.65	0.56	0.64	0.76	0.46	0.48	0.48	0.65	0.58	0.67	0.73	0.57	0.69	0.67	0.66	0.66	0.64	0.68	0.69	0.75	0.44	0.5	0.5	0.5	0.58	0.65	0.55	0.64
MnO	0.17	0.16	0.11	0.12	0.09	0.02	0.14	0.09	0.11	0.11	0.11	0.1	0.12	0.13	0.14	0.13	0.2	0.15	0.1	0.12	0.13	0.13	0.1	0.1	0.09	0.05	0.05	0.13	0.15	0.13	0.15
Fe2O3	10.71	10.64	7.09	6.83	5.95	4.81	7.54	5.93	5.8	5.8	5.89	5.84	7.84	7.97	6.43	7.78	7.8	7.88	6.95	7.44	7.32	8.27	7.07	4.62	5.76	4.92	4.92	6.51	7.65	6.88	7.93
Na2O	2.87	2.87	3.24	3.42	3.22	2.59	3.28	3.32	3.6	3.6	3.67	3.71	3.21	2.32	3.34	3.14	3.12	2.83	2.83	2.39	2.31	3.14	3.23	2.4	3.1	3.28	3.28	3.12	2.88	3.08	2.85
MgO	8.42	8.42	3.25	3.29	1.47	1.67	3.61	1.82	2.01	2.01	2.53	1.62	3.36	3.11	0.65	3.42	3.66	3.72	2.79	2.59	2.59	3.66	3.3	1.02	1.89	1.06	1.06	2.58	2.99	1.73	2.44
K2O	1.34	1.31	2	2.01	2.07	2.28	1.97	2.13	2.09	2.09	1.97	1.94	1.89	0.59	2.36	1.93	1.92	1.9	2.05	2.11	2.12	1.87	1.93	2.79	2.27	2.65	2.65	1.72	1.99	2.21	1.9
CaO	9.85	10.13	5.79	6.27	4.67	2.42	6.42	4.19	5.13	5.13	5.6	5.99	6.6	5.2	3.99	6	6.73	5.88	4.46	3.4	3.08	6.8	6.72	1.85	3.54	3.39	3.39	5.64	4.71	3.99	3.76
P2O5	0.35	0.35	0.21	0.21	0.14	0.1	0.22	0.21	0.22	0.22	0.23	0.22	0.23	0.3	0.25	0.22	0.2	0.22	0.21	0.21	0.22	0.24	0.24	0.12	0.18	0.16	0.16	0.19	0.22	0.23	0.22
LOI (%)	0.62	0.69	1.72	0.92	3.6	7.23	1.48	3.35	1.72	1.72	1.31	?	1.63	12.17	2.84	2.03	1.58	3.18	5.11	7.17	8	1.64	1.73	6.43	4.05	3.75	3.75	11.98	4.15	4.09	5.51
Sum (%)	99.4	99.68	100.06	100.5	100.5	101.48	100.46	100.52	100.43	100.43	100.78	98.61	100.65	100.7	100.82	100.51	100.72	100.88	100.86	100.71	101.02	101	100.85	100.76	100.03	99.88	99.88	100.89	100.99	100.88	100.97
Trace elements (XRF, ppm)
F	221	308	96	115	350	222	166	86	63	63	254	192	115	15	92	117	12	70	124	40	-	100	165	55	107	242	242	-	11	-	-
S	-	12	-	-	262	15014	-	81	-	-	-	-	-	1268	865	276	-	-	56	276	93	-	-	124	-	-	-	-	-	-	5
Cl	290	292	197	217	1065	367	211	176	224	224	224	203	230	670	1018	569	295	441	267	412	305	240	157	166	110	211	211	193	174	227	86
Sc	22	22	16	15	16	16	15	10	11	11	12	13	15	13	12	16	18	16	14	16	15	16	17	10	12	9	9	14	16	12	14
V	243	245	135	132	112	149	154	80	86	86	131	120	153	131	119	160	161	162	150	144	151	162	173	83	91	83	83	129	151	130	55
Cr	450	475	42	42	18	27	62	8	8	8	4	28	23	6	6	17	37	117	30	28	1	15	16	3	4	9	9	10	31	5	22
Co	48	49	22	22	28	31	26	14	18	18	25	24	27	19	34	25	42	27	24	20	23	25	25	13	14	17	17	22	23	23	18
Ni	147	150	18	21	15	14	27	10	8	8	10	15	12	12	11	14	19	27	7	8	10	16	13	8	8	9	9	9	11	12	15
Cu	47	47	112	53	33	28	44	24	24	24	25	29	30	52	25	40	41	44	21	30	24	45	31	23	28	26	26	28	31	15	29
Zn	83	86	58	56	61	29	62	49	50	50	66	53	62	84	65	71	69	64	67	72	70	66	68	230	57	61	61	55	63	61	76
Ga	20	19	20	18	19	19	19	21	19	19	19	19	20	25	20	20	18	20	19	20	21	20	20	19	19	18	18	17	20	19	20
As	5	6	5	5	5	13	5	4	6	6	5	6	6	5	5	5	6	5	5	5	4	5	4	5	4	5	5	4	6	5	9
Rb	35	33	76	71	56	73	70	76	74	74	67	75	69	22	86	69	70	70	72	74	76	66	65	109	84	103	103	60	68	80	54
Sr	524	530	436	468	402	288	456	372	437	437	421	466	454	402	414	368	399	363	305	242	219	468	459	203	322	358	358	393	326	400	396
Y	24	30	39	34	16	15	20	16	18	18	21	23	22	20	24	93	74	166	21	22	21	20	19	17	21	20	20	22	17	17	19
Zr	151	146	161	157	152	160	157	159	152	152	155	141	145	226	178	139	147	144	147	155	156	148	145	134	150	177	177	129	151	170	165
Nb	24	23	10	9	8	8	10	9	9	9	8	8	8	11	9	8	8	8	8	7	8	7	7	10	8	11	11	7	8	8	7
Mo	4	4	4	4	4	4	4	4	4	4	4	4	4	5	4	4	4	4	4	4	4	4	4	4	4	5	5	4	4	4	4
Sn	-	2	-	1	2	1	1	-	2	2	2	2	-	2	3	-	-	-	2	-	2	1	1	2	2	3	3	-	2	1	1
Sb	-	-	-	-	1	-	-	1	1	1	-	2	-	-	-	-	-	-	-	-	1	-	-	-	1	1	1	-	1	1	1
Cs	12	12	7	7	6	7	7	6	6	6	6	7	7	6	2	7	6	9	6	6	6	7	7	-	5	5	5	6	6	2	2
Ba	453	488	634	688	650	977	611	772	737	737	644	702	561	889	713	798	726	709	734	738	833	556	564	844	722	845	845	573	651	716	704
La	26	37	53	43	16	15	24	12	19	19	19	21	18	12	29	41	62	160	18	18	20	15	21	14	26	33	33	23	12	19	21
Ce	62	48	66	56	46	41	52	43	47	47	56	53	48	46	55	43	65	71	44	41	45	48	41	44	50	58	58	41	47	42	46
Nd	25	27	47	30	22	18	23	18	28	28	23	20	22	22	26	53	65	130	21	22	21	19	23	20	29	29	29	26	15	18	23
Tl	-	-	-	-	-	-	-	-	-	-	-	-	-	-	-	-	-	-	-	1	1	-	-	1	-	-	-	-	2	-	-
Pb	3	3	3	5	7	7	3	7	5	5	3	5	4	9	6	4	5	5	3	12	18	6	4	46	6	7	7	3	5	3	7
Th	6	6	10	9	10	11	9	10	9	9	7	8	7	16	11	8	7	8	8	8	10	8	7	9	10	14	14	7	10	10	11
U	3	3	3	3	3	3	3	3	3	3	3	3	3	3	3	3	3	3	3	3	3	3	3	3	3	3	3	3	3	3	3

## Sheet: ICP settings
Instrument settings for LA-ICP-MS
ICP-MS
Model		Elan 6100 DRCII ICP-MS (Perkin Elmer Sciex)
Gas flows	Plasma (Ar)	15 L.min
	Auxiliary (Ar)	1.2 L.min
	Carrier (He)	1.0 L.min
	Nebuliser	0.6 to 0.7 optimised range
Shield torch		Used for most analyses
Vacuum pressure		1 x 10-5 Torr
Software		Elan 3.4
LASER
Model		RESOlution SE series excimer laser
Wavelength		193 nm
Repetition rate		5 Hz
Pre-ablation laser warm-up		Laser fired continuously
Spot size		30 μm (60 for NIST)
Incident pulse energy		c. 0.04 mJ
Energy density on sample (fluence)		c. 6 J.cm2
Software		Geostar v8.50
DATA ACQUISITION PARAMETERS
Data acquisition protocol		Time resolved analyses
Scanning mode		Peak hopping, 1 point per peak
Detector mode		Pulse counting, dead time correction applied
Isotopes determined		Al27, Si28, K39, Sc45, Ti47, V51, Rb85, Sr88, Y89, Zr90, Nb93, Sn118, Cs133, Ba138, La139, Ce140, Pr141, Nd142, Sm152, Eu153, Gd158, Dy164, Ho165, Er166, Yb174, Lu175, Pb208, Th232, U238.
Dwell time per isotope		10 ms (Al, Si, K) and 50 ms (all other elements)
Quadrapole settling time		c. 2 ms
Data acquisition		85 s (40 s background, 45 s ablation)
Software		Elan 3.4

## Sheet: ICP data 
Sample:	NIST612-1	NIST612-2	NIST612-3	NIST612-4	NIST612-5	StHs-1	StHs-2	ML3-1	ML3-2	GOR128-1	GOR128-2	KSC001	KSC002	GF006	GF007	MSE010	MSE017-1	MSE017-2	MSE018-1	MSE018-2	MSE019-1	MSE019-2	MSE020	MSE022	MSE039b-1	MSE039b-2	ORE040	HF043	HF044	MSE045	MSE053	MSE054	MSE056	MSE057	MSE060	MSE062
Major element concentrations (ppm)
Al	10980	11390	11210	11180	11110	95600	96100	72690	72700	52740	51760	57000	57200	68200	68900	70900	67700	68500	74500	73400	73000	72100	72600	73500	75200	75300	72600	70200	71300	74200	73800	72200	73100	68500	74900	74300
Al (2σ)	160	150	130	120	110	1400	1300	870	1100	390	700	1900	2000	3500	3200	3400	3300	3300	3900	3200	3500	3600	3800	4200	3900	4200	3900	3700	3700	4100	4100	4200	3900	3600	4600	4200
K	66.4	66.4	66	65.8	67	14240	14510	3177	3168	329.2	329.4	9450	9070	14140	14150	14580	13740	13770	15140	14920	15040	15050	13970	13240	16850	16920	13560	13450	13180	14510	13460	13620	16200	18970	14170	15800
K (2σ)	1.5	1	1.3	1.6	1.7	290	190	48	56	6.9	7.4	180	170	260	290	250	270	210	230	210	210	240	220	210	230	280	220	230	240	230	210	250	220	260	230	190
Ti	45.3	41.5	43.5	44.7	44.2	4081	4220	12040	12060	1669	1664	8430	8210	4750	4680	3997	5080	5080	4250	4300	4279	4308	4190	4860	4390	4280	4970	4980	4850	4960	5213	4990	4369	4178	5100	4380
Ti (2σ)	1.4	1.6	1.6	1.3	1.9	60	66	180	170	22	21	200	170	100	140	99	120	100	100	82	92	91	110	120	110	120	110	110	110	110	94	130	90	96	110	110
Trace element concentrations (ppm)
Sc	41.76	40.13	40.56	41.48	41.06	10.18	10.15	29.68	29.39	31.67	30.09	25.2	24.5	13.86	13.08	12.09	14.86	16.8	9.72	10.15	10.27	11.17	11.6	15.75	10.32	9.61	16.3	19.1	17.9	16.7	18.6	17.6	11.9	9.39	15.34	11.1
Sc (2σ)	0.66	0.66	0.65	0.65	0.56	0.27	0.25	0.58	0.63	0.49	0.45	1.7	1.5	0.91	0.73	0.87	0.97	1.3	0.82	0.96	0.73	0.98	1.2	0.93	0.76	0.92	1	1.2	1.1	1	1.1	1.3	1.1	0.74	0.84	1.1
V	39.62	37.95	39.05	39.54	38.93	81.4	84.6	271.6	273.1	177.2	180.2	244.4	239.1	171.9	173	135.4	183.3	188.3	135.7	132.2	135.4	134.5	151.4	197.2	152.9	150.3	205.6	214.5	207.8	197.6	224.4	199.2	143.4	127.9	202.4	181
V (2σ)	0.62	0.65	0.59	0.77	0.63	1.1	1.2	3.4	3.6	1.8	3.2	5.4	6	4.3	4.8	4.6	4.7	4.8	3.7	3.7	3.3	3.8	4.9	4.8	5.2	4.3	5.2	4.9	6.6	4.8	4.6	5.1	4.7	3.6	5.8	5.6
Rb	31.94	31.05	30.96	31.84	31.36	28.49	28.58	5.63	5.74	0.38	0.381	21.1	21	52.9	49	37.6	48.3	47.3	52.3	53.7	53.7	52.2	48.4	49.6	62.9	63.1	48.1	50.8	48.9	49.7	47	48.7	58.2	72.2	50.2	57.4
Rb (2σ)	0.49	0.39	0.46	0.42	0.39	0.71	0.6	0.21	0.19	0.054	0.042	1.3	1.4	1.6	2	2.2	2	1.6	2.1	1.8	1.7	1.8	2.3	2.1	2.6	2.8	2.1	2	2.5	2.4	1.6	1.8	2.4	2.9	2.3	2.4
Sr	79.38	76.2	78	79.2	78.44	459.8	475.4	294.5	293.6	29.39	29.25	421	417.1	346.4	384.5	326.2	364	367.8	302.4	300.3	365.3	366.3	353.9	382.1	346.2	348	304.6	330.4	303.1	259.3	406.9	398.6	263.5	296.9	278.2	343.8
Sr (2σ)	0.99	1.3	1.3	1.3	0.81	9.5	7.6	5.6	6.3	0.62	0.57	11	9.4	8.2	9.1	7.3	10	8.2	7.6	6.1	7.2	8.7	9.6	7.9	7	7.1	7	7	6.1	5.3	8.2	7.9	6.3	7.5	7.7	7.3
Y	38.38	37.09	38.03	38.47	37.86	10.8	10.68	22.04	21.72	11.27	11.03	17.55	21.27	27.4	25.7	11.7	14.39	14.91	12.01	12.26	15.19	15.2	15.9	16.9	18.8	19.2	74.6	57.8	131.6	17.67	15.95	16.6	16.11	16.3	12.86	14.2
Y (2σ)	0.44	0.55	0.54	0.58	0.56	0.29	0.3	0.51	0.42	0.25	0.19	0.87	0.86	1.3	1	0.77	0.96	0.85	0.66	0.69	0.97	0.79	0.96	0.9	1	0.73	2.4	1.8	3.6	0.87	0.68	0.87	0.69	1	0.72	1.1
Zr	38.95	37.33	37.98	38.48	37.92	113.4	113.2	113.7	112.6	9.21	9.29	113.6	108.4	118.2	120.1	113	117.4	117.7	122.8	122.9	119.5	123.1	118.1	111.7	140.4	143.4	107.4	112.9	109.6	115.2	115.1	113.2	123.9	146.7	118	136.4
Zr (2σ)	0.73	0.5	0.49	0.61	0.51	1.8	1.9	2.1	1.9	0.26	0.27	3.9	3.4	2.7	4	3.6	2.8	3.5	5.3	3	3.3	3.8	4.1	4	4.6	3.8	3.8	4.1	3.8	3.9	4.1	3.1	3.8	5.4	3.7	4.9
Nb	40.52	38.95	40.14	40.33	39.96	6.34	6.72	7.94	8.05	0.099	0.085	18.9	17.96	7.41	7.17	7.21	7.71	7.61	7.7	8.11	8.04	7.8	7.37	6.98	8.83	8.72	6.84	6.02	6.3	6.51	6.77	5.74	7.51	9.35	7.17	7.95
Nb (2σ)	0.54	0.62	0.57	0.63	0.44	0.21	0.16	0.24	0.18	0.02	0.016	1.1	0.91	0.61	0.57	0.58	0.58	0.65	0.4	0.74	0.52	0.65	0.61	0.57	0.54	0.59	0.57	0.62	0.54	0.72	0.64	0.6	0.64	0.66	0.69	0.7
Sn	38.76	36.91	38	39.2	37.73	2.81	1.98	1.78	1.69	1.45	1.27	10	4.79	3.82	2.94	3.1	2.95	3.46	3.61	3.31	4.1	3.7	1.69	3.32	3.16	3.52	2.6	2.3	2.81	3.03	3.02	1.53	1.97	2.23	2.35	2.31
Sn (2σ)	0.82	0.82	1	1.1	0.95	0.54	0.17	0.21	0.21	0.16	0.12	1.5	0.98	0.96	0.81	0.65	0.73	0.87	0.98	0.85	1	0.93	0.88	0.83	0.91	0.86	0.89	1	0.88	0.75	0.97	0.77	0.82	0.81	0.79	0.84
Cs	42.51	41.18	42.12	42.31	41.89	1.85	1.904	0.129	0.143	0.222	0.184	0.46	0.32	1.87	1.75	1.53	1.04	1.27	1.65	2	1.26	1.26	0.79	1.47	1.08	1.09	1.63	1.56	1.34	2.43	0.98	1.15	1.71	1.83	1.43	1.6
Cs (2σ)	0.48	0.52	0.51	0.56	0.66	0.12	0.09	0.032	0.02	0.026	0.03	0.17	0.13	0.32	0.39	0.28	0.29	0.24	0.26	0.29	0.27	0.32	0.32	0.32	0.26	0.25	0.26	0.34	0.26	0.54	0.24	0.24	0.29	0.3	0.29	0.26
Ba	40.2	38.68	39.52	40.48	39.67	290.9	303.9	75.4	75.7	1.055	0.95	320.2	327.2	512	515	512	475	483	553	559	601	608	519	481	604	596	488	567	531	598	469	495	615	690	550	603
Ba (2σ)	0.52	0.67	0.74	0.85	0.49	4.8	4.9	1.9	2	0.061	0.088	7.5	7.8	14	15	15	12	11	15	13	10	14	14	13	15	13	11	15	16	13	9.7	13	17	18	14	13
La	36.39	35.06	35.6	36.31	35.7	11.61	11.98	8.3	8.3	0.121	0.1	23	28.5	41.9	35.2	18.9	20.4	20.6	19.8	18.6	23.4	24.1	22.9	21.5	28.9	29.1	34.1	48	116.3	19	19.3	20.7	27.7	32	16.5	20.1
La (2σ)	0.54	0.55	0.52	0.54	0.51	0.36	0.29	0.3	0.27	0.032	0.023	1.3	1.7	1.4	1.8	1.1	1.2	1.1	1.3	1.2	1.2	1.1	1.4	1.5	1.7	1.3	1.8	1.7	3.3	1.4	1.3	1.2	1.5	1.7	1	1.5
Ce	39.14	38.05	38.67	39.45	38.46	25.47	26.04	21.8	22.21	0.452	0.444	40.9	37.4	45.3	41.5	35.7	37.6	37.6	34.7	35.6	41.4	41.2	43.7	39.3	49.1	47.5	37.6	50.4	54	37.5	37.5	40.9	42.6	43.4	36	38
Ce (2σ)	0.48	0.47	0.55	0.65	0.61	0.66	0.48	0.61	0.43	0.055	0.045	1.6	1.9	2.1	1.7	1.7	1.9	2	1.8	1.7	1.5	1.6	2.4	2.4	2.3	2.4	2	2.6	2.6	1.5	1.8	1.7	2.2	2.5	1.9	1.8
Pr	37.89	36.59	37.18	37.92	37.13	3.03	3.1	3.31	3.03	0.095	0.101	4.93	5.06	8.56	6.2	3.55	4.42	4.37	3.8	4.22	4.95	5.57	4.44	4.09	6.19	6.66	9.73	12.8	27.1	4.74	4.18	5.74	6.22	6.64	3.79	3.87
Pr (2σ)	0.57	0.46	0.53	0.77	0.55	0.11	0.14	0.15	0.13	0.023	0.022	0.5	0.44	0.76	0.49	0.41	0.49	0.44	0.49	0.52	0.57	0.59	0.54	0.52	0.58	0.57	0.76	1.1	1.4	0.56	0.65	0.57	0.68	0.66	0.49	0.58
Nd	36.58	34.9	35.62	36.46	35.77	15.98	15.92	16.88	17.02	0.68	0.59	25.7	25.7	38	27.6	19.2	22	21.2	20.9	21.6	26	25.4	24.3	23.1	28.9	28.1	42.1	49.8	97.9	22.1	22	23.4	29.4	27.5	18.8	21.9
Nd (2σ)	0.65	0.71	0.66	0.64	0.73	0.57	0.46	0.57	0.57	0.11	0.1	2.1	2	2.6	1.8	1.8	1.8	1.9	1.6	1.6	1.7	1.4	2.2	1.6	2.1	1.4	3.1	3.2	3.4	1.8	1.7	2.4	2.2	2.2	1.7	2
Sm	39.07	37	38.09	38.72	38.06	2.86	2.75	4.61	4.4	0.55	0.46	4.71	4.8	6.4	3.78	2.39	3.33	3.66	2.79	3.15	4.9	4.5	2.86	4.9	5.3	4.62	10.2	12.1	21.6	3.5	2.54	3.83	4.5	3.81	2.02	2.45
Sm (2σ)	0.81	0.74	0.75	0.92	0.76	0.27	0.19	0.42	0.37	0.14	0.085	0.93	1.1	1.1	0.93	0.79	0.84	0.99	0.76	0.98	1.4	1.3	0.81	1.1	1.3	0.76	1.6	1.4	2.5	1.1	0.72	0.86	1.1	0.97	0.65	0.85
Eu	36.04	34.16	34.97	35.49	34.85	0.95	0.91	1.47	1.53	0.237	0.297	1.19	1.47	1.99	1.44	0.95	1.33	1.1	0.97	0.76	1.01	1.23	1.16	0.99	1.15	0.99	3.07	2.74	6.5	0.9	1.11	0.83	1.1	0.7	0.91	0.92
Eu (2σ)	0.84	0.62	0.61	0.61	0.59	0.11	0.11	0.15	0.14	0.041	0.055	0.27	0.5	0.39	0.42	0.42	0.4	0.39	0.32	0.33	0.32	0.38	0.39	0.35	0.33	0.33	0.68	0.65	1	0.32	0.31	0.32	0.37	0.33	0.36	0.34
Gd	37.68	35.44	36.1	37.08	36.95	2.35	2.38	4.84	4.72	1.14	1.03	3.54	3.98	6.2	4.9	2.04	3.05	3.5	2.28	2.68	3.43	2.51	3.4	4.2	3.8	3.13	12.3	10.3	23.2	2.71	2.1	2.89	3.3	2.94	3	2.88
Gd (2σ)	0.82	0.92	0.86	0.91	0.77	0.26	0.25	0.4	0.41	0.16	0.14	0.77	0.82	1.1	1.1	0.79	0.95	1	0.74	0.93	0.98	0.88	1.2	1.2	1.1	0.85	1.9	1.8	2.2	0.89	0.6	0.73	1.1	0.96	1.2	0.95
Dy	37.05	35.1	35.5	36.63	35.83	2.15	2.11	4.6	4.55	1.94	1.83	2.9	4.2	4.94	3.91	2.04	3.18	2.77	2.37	1.78	2.42	2.8	2.68	2.5	3.59	3.04	12.7	8.4	21.1	3.33	2.85	2.96	2.77	1.92	2.72	2.63
Dy (2σ)	0.9	0.74	0.86	0.69	0.8	0.21	0.21	0.28	0.26	0.16	0.21	0.76	1	0.74	0.88	0.7	0.93	0.82	0.75	0.67	0.6	0.6	0.83	0.55	0.72	0.8	1.7	1.4	2.1	0.89	0.96	0.63	0.77	0.65	0.71	0.93
Ho	38.51	37.04	37.57	38.52	38.07	0.421	0.412	0.844	0.853	0.439	0.381	0.71	0.69	0.92	0.77	0.39	0.59	0.52	0.49	0.38	0.37	0.59	0.47	0.55	0.84	0.67	2.44	1.97	4.36	0.53	0.57	0.66	0.47	0.47	0.62	0.41
Ho (2σ)	0.51	0.66	0.66	0.7	0.55	0.049	0.06	0.074	0.077	0.047	0.039	0.17	0.2	0.22	0.2	0.15	0.19	0.19	0.17	0.11	0.15	0.21	0.17	0.15	0.27	0.21	0.4	0.36	0.5	0.22	0.15	0.25	0.15	0.17	0.21	0.19
Er	38.67	37.05	37.5	39.02	37.86	1.21	1.12	2.14	2.14	1.34	1.46	1.94	2.2	2.88	1.45	1.7	1.56	1.18	0.94	1.72	1.76	1.37	1.05	1.26	1.95	2.05	6.4	6.2	12.6	1.1	1.62	2.01	1.53	1.71	0.97	1.73
Er (2σ)	0.76	0.82	0.78	0.84	0.65	0.14	0.14	0.2	0.22	0.14	0.18	0.43	0.62	0.81	0.45	0.53	0.6	0.48	0.43	0.64	0.6	0.39	0.46	0.47	0.59	0.6	1.2	1.2	1.6	0.48	0.58	0.59	0.67	0.56	0.39	0.49
Yb	40.08	38.15	38.74	40.17	39	1.27	1.14	1.92	1.76	1.49	1.3	2.03	1.33	2.93	2.29	0.98	1.85	2.22	1.09	1.39	1.61	1.47	2.12	1.67	2.51	2	6.4	5.4	10.7	1.98	1.47	1.37	1.37	1.74	1.3	2.22
Yb (2σ)	0.93	0.92	0.71	0.83	0.8	0.17	0.12	0.18	0.19	0.18	0.15	0.72	0.59	0.63	0.61	0.44	0.64	0.56	0.38	0.47	0.54	0.57	0.62	0.46	0.72	0.65	1.3	1.1	1.1	0.7	0.47	0.56	0.64	0.67	0.55	0.78
Lu	37.19	36.05	36.6	37.55	36.89	0.141	0.172	0.259	0.229	0.212	0.194	0.19	0.29	0.42	0.38	0.2	0.2	0.22	0.206	0.13	0.22	0.155	0.33	0.2	0.31	0.38	1.12	0.84	1.63	0.25	0.28	0.21	0.3	0.33	0.19	0.17
Lu (2σ)	0.37	0.57	0.56	0.65	0.53	0.029	0.034	0.031	0.035	0.032	0.035	0.1	0.15	0.14	0.13	0.14	0.1	0.11	0.091	0.085	0.11	0.098	0.12	0.11	0.11	0.16	0.21	0.22	0.33	0.14	0.14	0.15	0.16	0.14	0.1	0.12
Pb	39.9	37.6	37.58	38.78	39.2	9.31	9.38	1.26	1.31	0.261	0.25	1.92	2.85	3.29	4.6	3.39	3.36	3.25	4.4	4.8	3.71	3.97	2.45	4.99	6.26	5.73	4.32	4.83	3.84	3.96	5.5	3.77	4.05	4.77	3.58	4.62
Pb (2σ)	1.1	1	0.98	0.91	1	0.44	0.41	0.13	0.16	0.061	0.049	0.42	0.59	0.76	1	0.7	0.68	0.6	0.76	0.64	0.75	0.67	0.43	0.93	0.84	0.92	0.8	0.84	0.81	0.65	1.1	0.75	0.67	0.75	0.6	0.95
Th	38.12	37.25	37.53	38.58	37.57	2.212	2.38	0.521	0.536	0.0058	0.0055	3.36	3.37	6.94	7.08	7.36	6.96	6.73	6.86	6.94	7.32	7.38	6.92	5.92	8.61	9.66	5.99	6.31	6.5	6.97	5.68	6.22	8.31	10.87	6.96	7.64
Th (2σ)	0.47	0.5	0.56	0.56	0.48	0.088	0.13	0.047	0.058	0.0055	0.0052	0.45	0.43	0.7	0.69	0.69	0.7	0.85	0.76	0.59	0.83	0.74	0.67	0.71	0.9	0.74	0.83	0.82	0.79	0.56	0.58	0.77	0.82	0.95	0.81	0.63
U	37.76	36.77	37.08	38.29	37.18	0.974	0.922	0.418	0.402	0.0077	0.0159	0.98	0.93	1.42	1.73	1.43	1.68	1.37	1.8	1.93	1.77	1.63	1.59	1.53	1.91	2.15	1.54	1.39	1.36	1.36	1.76	1.72	1.63	2.35	1.41	1.98
U (2σ)	0.55	0.6	0.54	0.63	0.5	0.08	0.07	0.044	0.032	0.0058	0.009	0.24	0.22	0.32	0.31	0.26	0.32	0.27	0.4	0.39	0.34	0.38	0.34	0.34	0.36	0.3	0.29	0.24	0.26	0.3	0.35	0.29	0.3	0.4	0.36	0.45

## Sheet: Sr.Nd isotopes
	GF006	KSC001	MRD020	ORE039b	ORE040	AGV-2	987 Standard2	987 Standard3	J&M standard 1	J&M standard 2
84Sr/86Sr	0.056488	0.056488	0.05649	0.056492	0.056493	0.056488	0.056492	0.056488	-	-
2σ	1.6e-06	1.8e-06	1.8e-06	1.6e-06	1.5e-06	1.6e-06	1.7e-06	1.7e-06	-	-
2σ ppm	28	32	31	28	26	28	29	29	-	-
87Sr/86Sr	0.704478	0.70385	0.704555	0.704784	0.704645	0.70398	0.710256	0.710256	-	-
2σ	3.8e-06	3.7e-06	3.7e-06	3.9e-06	3.8e-06	4e-06	3.9e-06	3.5e-06	-	-
2σ ppm	5	5	5	6	5	6	5	5	-	-
143Nd/144Nd corrected	0.51281	0.512849	0.512807	0.512771	0.512775	-	-	-	0.511817	0.511819
2σ	3.9e-06	6e-06	1.06e-05	3.5e-06	3.9e-06	-	-	-	3.6e-06	3e-06
2σ ppm	8	12	21	7	8	-	-	-	6.9	5.9
